# Supplementary material for: Substitution of fluorine in M[C6F5BF3] with organolithium compounds: distinctions between O- and N-nucleophiles
Source: publisher site journal article supplement (doi:10.3762/bjoc.13.69), 2017-04-12
Supplement: Additional file 1 [file 1860-5397-13-69-S1.pdf]

# Supporting information

for

## Substitution of fluorine in $M[C_6F_5BF_3]$ with organolithium compounds: distinctions between O- and N-nucleophiles

Anton Yu. Shabalin<sup>1,2</sup>, Nicolay Yu. Adonin<sup>\*1,2</sup> and Vadim V. Bardin<sup>2,3</sup>

Address: <sup>1</sup>G.K. Boreskov Institute of Catalysis, SB RAS, Acad. Lavrentjev Ave. 5, Novosibirsk, 630090, Russian Federation, <sup>2</sup>Novosibirsk State University, Pirogova str., 2, Novosibirsk, 630090, Russian Federation and <sup>3</sup>N.N. Vorozhtsov Novosibirsk Institute of Organic Chemistry, SB RAS, Acad. Lavrentjev Ave. 9, Novosibirsk, 630090, Russian Federation

Email: Nicolay Yu. Adonin\* - adonin@catalysis.ru

\*Corresponding author

### Full experimental details and compounds characterization data

#### Table of Contents

|                                                                                |    |
|--------------------------------------------------------------------------------|----|
| 1. General.....                                                                | 2  |
| 2. Preparation of $[Bu_4N][C_6F_5BF_3]$ (1-N) .....                            | 2  |
| 3. Reaction of $K[C_6F_5BF_3]$ with methyllithium.....                         | 2  |
| 4. Reaction of $M[C_6F_5BF_3]$ with butyllithium .....                         | 4  |
| 5. Reaction of $K[C_6F_5BF_3]$ with phenyllithium.....                         | 6  |
| 6. Hydrodeboration of potassium polyfluoroaryltrifluoroborates with MeOH ..... | 7  |
| 7. Attempted reaction of $K[C_6F_5BF_3]$ with phenylethynyllithium .....       | 9  |
| 8. Reaction of $M[C_6F_5BF_3]$ with alkali halides .....                       | 10 |
| 9. Stability of $M[C_6F_5BF_3]$ in solution.....                               | 11 |
| 10. Reaction of $K[C_6F_5BF_3]$ with MeONa (excess).....                       | 11 |

## 1. General

The NMR spectra were recorded on Bruker AVANCE 300 ( $^1\text{H}$  at 300.13 MHz,  $^{19}\text{F}$  at 282.40 MHz), and Bruker AVANCE 600 ( $^{11}\text{B}$  at 192.60 MHz) spectrometers. The chemical shifts are referenced to TMS ( $^1\text{H}$ ),  $\text{CCl}_3\text{F}$  ( $^{19}\text{F}$ , with  $\text{C}_6\text{F}_6$  as secondary reference (-162.9 ppm)), and  $\text{BF}_3\cdot\text{OEt}_2/\text{CDCl}_3$  (15% v/v) ( $^{11}\text{B}$ ), respectively. GC-MS analysis was done on a Hewlett-Packard 1800A (with HP-5MS column) instrument. High-resolution mass spectra were recorded on a Thermo Scientific DFS spectrometer in EI mode (70 eV). Diglyme (Acros) and 1,2-dimethoxyethane (Acros) were stirred with  $\text{CaH}_2$ , distilled and stored over molecular sieves 4 Å under an argon atmosphere. NaH (60% dispersion in oil) (Sigma-Aldrich), BuLi in hexanes (Acros) was used as supplied. Ether was passed through column with alumina dried at 500 °C for 4 h and stored over sodium. Potassium pentafluorophenyltrifluoroborate [1], MeLi in ether [2], PhLi in ether [3], and  $\text{PhC}\equiv\text{CLi}$  in ether [4] were prepared as described and stored at 5–8 °C. The actual concentration of organolithium was controlled before use by titration with 0.1 N HCl (MeLi and  $\text{PhC}\equiv\text{CLi}$ ) and by Watson's method [5] (PhLi and BuLi). All manipulations with organolithium reagents were performed under an atmosphere of dry argon.

The solubility of  $\text{K}[\text{C}_6\text{F}_5\text{BF}_3]$  in DME (22 °C) exceeds 225 mg (0.82 mmol) per mL. The solubility of  $[\text{Bu}_4\text{N}]\text{I}$  in diglyme (22 °C) is 3.4 mg (0.008 mmol) per mL.

## 2. Preparation of $[\text{Bu}_4\text{N}][\text{C}_6\text{F}_5\text{BF}_3]$ (1-N)

Suspension of  $\text{K}[\text{C}_6\text{F}_5\text{BF}_3]$  (125 mg, 0.45 mmol) and  $[\text{Bu}_4\text{N}]\text{Br}$  (151 mg, 0.47 mmol) in MeCN (3 mL) was stirred at 22 °C for 2 h and centrifuged. The supernatant was evaporated to dryness under reduced pressure to yield  $[\text{Bu}_4\text{N}][\text{C}_6\text{F}_5\text{BF}_3]$  (colorless oil, 200 mg, 93%).

**$[\text{Bu}_4\text{N}][\text{C}_6\text{F}_5\text{BF}_3]$  (1-N).**  $^{11}\text{B}$  NMR ( $\text{CD}_2\text{Cl}_2$ ):  $\delta$  1.51 (q,  $^1J(\text{B}, \text{F}) = 44$  Hz,  $\text{BF}_3$ ).  $^{19}\text{F}$  NMR ( $\text{CD}_2\text{Cl}_2$ ):  $\delta$  -134.1 (q (1:1:1:1),  $^1J(\text{F}, \text{B}) = 44$  Hz, 3F,  $\text{BF}_3$ ), -135.4 (ddq (1:1:1:1),  $^3J(\text{F}^2, \text{F}^3) = 24$  Hz,  $^5J(\text{F}^2, \text{F}^5) = 12$  Hz,  $^4J(\text{F}^2, \text{BF}) = 12$  Hz, 2F,  $\text{F}^2, ^6$ ), -161.7 (t,  $^3J(\text{F}^4, \text{F}^3, ^5) = 20$  Hz, 1F,  $\text{F}^4$ ), -166.2 (m, 2F,  $\text{F}^3, ^5$ ).

## 3. Reaction of $\text{K}[\text{C}_6\text{F}_5\text{BF}_3]$ with methyllithium

3.1. A three-necked flask equipped with a reflux condenser topped with gas inlet/outlet tube and bubbler, a Teflon-coated magnetic bar, septum inlet, and adapter

for an addition of MeLi was filled with dry argon and charged with  $\text{K}[\text{C}_6\text{F}_5\text{BF}_3]$  and DME. The colorless solution was stirred for 10-15 min. MeLi in ether was siphoned into a measuring vessel and then added in portions to the above solution. Immediately white precipitate formed. At the end of the reaction, a saturated aqueous solution of KF (10 mL) was added to the suspension, and after 1 h an organic phase was decanted, dried with  $\text{MgSO}_4$  and analyzed by the  $^{19}\text{F}$  NMR spectroscopy (Table 1).

3.2.  $\text{K}[\text{C}_6\text{F}_5\text{BF}_3]$  (276 mg, 1.0 mmol) in DME (10 mL) was reacted with 0.36 M MeLi in ether (10 mL, 3.6 mmol) at 22 °C for 3 h, and treated with saturated aqueous solution of KF (20 mL). The organic phase contained **2-K** (0.55 mmol) and **3-K** (0.05 mmol) (Table 1, entry 4). Solution was evaporated to dryness on an evaporator, solid residue was washed with benzene (10 mL) and dried at 40 °C under reduced pressure to yield **2-K** and **3-K** (1:0.10) (206 mg).

**$\text{K}[\text{4-MeC}_6\text{F}_4\text{BF}_3]$  (**2-K**).**  $^1\text{H}$  NMR (acetone- $d_6$ ):  $\delta$  2.15 (t,  $^4J(\text{H}_3\text{C}, \text{F}^{3,5}) = 2$  Hz, 3H,  $\text{CH}_3$ ).  $^{11}\text{B}$  NMR and  $^{19}\text{F}$  NMR spectra coincided with reported ones [6].

**$\text{K}[\text{2-MeC}_6\text{F}_4\text{BF}_3]$  (**3-K**).**  $^1\text{H}$  NMR (acetone- $d_6$ ):  $\delta$  2.28 (m, 3H,  $\text{CH}_3$ ).  $^{11}\text{B}$  NMR (acetone- $d_6$ ):  $\delta$  2.45 (q,  $^1J(\text{B}, \text{F}) = 48$  Hz,  $\text{BF}_3$ ).  $^{19}\text{F}$  NMR (acetone- $d_6$ ):  $\delta$  -132.7 (dq (1:1:1:1),  $^4J(\text{F}^6, \text{BF}) = 15$  Hz,  $^1J(\text{F}, \text{B}) = 48$  Hz, 3F,  $\text{BF}_3$ ), -135.0 (m, 1F,  $\text{F}^6$ ), -145.3 (dd,  $^5J(\text{F}^3, \text{F}^6) = 13$  Hz,  $^3J(\text{F}^3, \text{F}^4) = 21$  Hz, 1F,  $\text{F}^3$ ), -163.9 (t,  $^3J(\text{F}^5, \text{F}^{4,6}) = 20$  Hz, 1F,  $\text{F}^5$ ), -164.2 (t,  $^3J(\text{F}^4, \text{F}^{3,5}) = 20$  Hz, 1F,  $\text{F}^4$ ).

Anal. calcd for  $\text{C}_7\text{H}_3\text{BF}_7\text{K}$  (270.00): C 31.1; H 1.12; F 49.26; found: C 30.6; H 1.11; F 48.9.

3.3.  $\text{K}[\text{C}_6\text{F}_5\text{BF}_3]$  (128 mg, 0.46 mmol) in DME (5 mL) was reacted with 0.92 M MeLi in ether (2 mL, 1.8 mmol) at 60–62 °C for 1 h. Suspension was cooled to 25 °C. The supernatant contained **4** (0.02 mmol), and several unknown compounds. After stirring of suspension with saturated aqueous solution of KF (10 mL) for 8 h the quantity of **4** increased to 0.14 mmol and resonances of pentafluorobenzene (0.01 mmol) and 2,3,4,5-tetrafluorotoluene (0.01 mmol) appeared besides unknown products ( $^{19}\text{F}$  NMR).

#### 4. Reaction of $M[C_6F_5BF_3]$ with butyllithium

4.1. Reaction of  $K[C_6F_5BF_3]$  (94 mg, 0.34 mmol) in DME (4 mL) with BuLi in hexanes (2.4 M, 0.3 mL, 0.72 mmol) was performed at 22 °C over a period of 2 h as described in 3.1. The  $^{19}F$  NMR spectrum showed signals of  $K[4-BuC_6F_4BF_3]$  (0.22 mmol), and  $K[2-BuC_6F_4BF_3]$  (0.04 mmol) (Table 2, entry 1).

4.2. BuLi (2.4 M, 1.2 mL, 2.8 mmol) in hexanes was added in portions to stirred solution of  $K[C_6F_5BF_3]$  (279 mg, 1.0 mmol) in DME (10 mL) and maintained at 25 °C for 2 h. After treatment with aqueous KF for 1 h, organic phase was decanted and dried with  $MgSO_4$ . The  $^{19}F$  NMR spectroscopy showed the presence of **6-K** (0.65 mmol) and **7-K** (0.07 mmol) and absence of **1-K** (Table 2, entry 2).

Solutions of **6-K** and **7-K** from several experiments were combined and evaporated to dryness under reduced pressure. Solid residue was washed with  $CH_2Cl_2$  (3 mL), suspension was centrifugated, organic phase was decanted and solid was dried on an air. An isomer mixture  $K[4-BuC_6F_4BF_3]$  (0.49 mmol) and  $K[6-BuC_6F_4BF_3]$  (0.10 mmol) (185 mg) was obtained ( $^{19}F$  NMR).

**$K[4-BuC_6F_4BF_3]$  (6-K).**  $^1H$  NMR (acetone- $d_6$ ):  $\delta$  2.66 (t,  $^3J(H^1, H^2) = 7.5$  Hz, 2H,  $H^1$ ), 1.54 (tt,  $^3J(H^2, H^1) = 7.5$  Hz,  $^3J(H^2, H^3) = 7.2$  Hz, 2H,  $H^2$ ), 1.34 (qt,  $^3J(H^3, H^4) = 7.2$  Hz,  $^3J(H^3, H^2) = 7.4$  Hz, 2H,  $H^3$ ), 0.91 (t,  $^3J(H^4, H^3) = 7.4$  Hz, 3H,  $H^4$ ).  $^{11}B$  NMR (acetone- $d_6$ ):  $\delta$  1.93 (q,  $^1J(B, F) = 44$  Hz,  $BF_3$ ).  $^{19}F$  NMR (acetone- $d_6$ ):  $\delta$  -133.9 (q (1:1:1:1),  $^1J(F, B) = 43$  Hz, 3F,  $BF_3$ ), -135.7 (ddq (1:1:1:1),  $^3J(F^2, F^3) = 24$  Hz,  $^5J(F^2, F^5) = 12$  Hz,  $^4J(F^2, BF) = 12$  Hz, 2F,  $F^{2,6}$ ), -148.2 (dd,  $^3J(F^3, F^2) = 24$  Hz,  $^5J(F^3, F^6) = 15$  Hz, 2F,  $F^{3,5}$ ).

**$K[2-BuC_6F_4BF_3]$  (7-K).**  $^1H$  NMR (acetone- $d_6$ ):  $\delta$  2.66 (t,  $^3J(H^1, H^2) = 7.5$  Hz, 2H,  $H^1$ ), 1.54 (tt,  $^3J(H^2, H^1) = 7.5$  Hz,  $^3J(H^2, H^3) = 7.2$  Hz, 2H,  $H^2$ ), 1.34 (qt,  $^3J(H^3, H^4) = 7.2$  Hz,  $^3J(H^3, H^2) = 7.4$  Hz, 2H,  $H^3$ ), 0.91 (t,  $^3J(H^4, H^3) = 7.4$  Hz, 3H,  $H^4$ ).  $^{11}B$  NMR (acetone- $d_6$ ):  $\delta$  2.50 (q,  $^1J(B, F) = 48$  Hz,  $BF_3$ ).  $^{19}F$  NMR (acetone- $d_6$ ):  $\delta$  -132.4 (q (1:1:1:1),  $^1J(F, B) = 44$  Hz, 3F,  $BF_3$ ), -134.7 (m, 1F,  $F^6$ ), -146.8 (dd,  $^3J(F^3, F^4) = 20$  Hz,  $^5J(F^3, F^6) = 14$  Hz, 1F,  $F^3$ ), -163.7 (t,  $^3J(F^5, F^{4,6}) = 20$  Hz, 1F,  $F^5$ ), -163.9 (t,  $^3J(F^4, F^{3,5}) = 20$  Hz, 1F,  $F^4$ ).

Anal. calcd for  $C_{10}H_9BF_7K$  (312.08): C 38.5; H 2.91; B 3.46; F 42.61; found: C 38.5; H 3.11; B 3.55; F 42.6.

4.3. BuLi (2.4 M, 0.5 mL, 1.2 mmol) in hexanes was added in portions to stirred solution of  $\text{K}[\text{C}_6\text{F}_5\text{BF}_3]$  (162 mg, 0.59 mmol) in DME (3 mL) and maintained at 55–60 °C for 1 h. The  $^{19}\text{F}$  NMR spectroscopy showed the presence of **6-K** (0.42 mmol), **7-K** (0.03 mmol), and presumably, **8** (0.02 mmol) and **9** (0.03 mmol) (Table 2, entry 3).

**$\text{K}[\text{2,5-Bu}_2\text{C}_6\text{F}_3\text{BF}_3]$  (**8**).**  $^{19}\text{F}$  NMR (DME):  $\delta$  –116.3 (dq (1:1:1:1),  $^5J(\text{F}^6, \text{F}^3) = 15$  Hz,  $^4J(\text{F}^6, \text{BF}) = 15$  Hz, 1F,  $\text{F}^6$ ), –132.9 (br, 3F,  $\text{BF}_3$ ), –145.7 (d,  $^3J(\text{F}^4, \text{F}^3) = 21$  Hz, 1F,  $\text{F}^4$ ), –148.3 (m, 1F,  $\text{F}^3$ ).

**$\text{K}[\text{2,4-Bu}_2\text{C}_6\text{F}_3\text{BF}_3]$  (**9**).**  $^{19}\text{F}$  NMR (DME):  $\delta$  –128.0 (d,  $^5J(\text{F}^3, \text{F}^6) = 17$  Hz, 1F,  $\text{F}^3$ ), –132.9 (br q, 3F,  $\text{BF}_3$ ), –137.0 (m, 1F,  $\text{F}^6$ ), –144.5 (d,  $^3J(\text{F}^5, \text{F}^6) = 23$  Hz, 1F,  $\text{F}^5$ ).

4.4. Reaction of  $\text{K}[\text{C}_6\text{F}_5\text{BF}_3]$  (87 mg, 0.32 mmol) in DME (2 mL) with BuLi in hexanes (2.4 M, 0.3 mL, 0.72 mmol) was performed in similar way (22 °C, 1 h). After addition of  $\text{KF} \cdot 2\text{H}_2\text{O}$  (50 mg) suspension was stirred for an additional 2 h and filtered. Filtrate was evaporated to dryness on evaporator to form white solid (88 mg). Crystallization from MeCN gave analytically pure  $\text{K}[\text{4-BuC}_6\text{F}_4\text{BF}_3]$ .

**$\text{K}[\text{4-BuC}_6\text{F}_4\text{BF}_3]$  (**6-K**).**  $^1\text{H}$  NMR ( $\text{CD}_3\text{CN}$ ):  $\delta$  2.66 (t,  $^3J(\text{H}^1, \text{H}^2) = 7.5$  Hz, 2H,  $\text{H}^1$ ), 1.54 (tt,  $^3J(\text{H}^2, \text{H}^1) = 7.5$  Hz,  $^3J(\text{H}^2, \text{H}^3) = 7.7$  Hz, 2H,  $\text{H}^2$ ), 1.34 (qt,  $^3J(\text{H}^3, \text{H}^4) = 7.4$  Hz,  $^3J(\text{H}^3, \text{H}^2) = 7.3$  Hz, 2H,  $\text{H}^3$ ), 0.91 (t,  $^3J(\text{H}^4, \text{H}^3) = 7.3$  Hz, 3H,  $\text{H}^4$ ).  $^{19}\text{F}$  NMR ( $\text{CD}_3\text{CN}$ ):  $\delta$  –133.6 (q (1:1:1:1),  $^1J(\text{F}, \text{B}) = 43$  Hz, 3F,  $\text{BF}_3$ ), –136.7 (ddq (1:1:1:1),  $^3J(\text{F}^2, \text{F}^3) = 23$  Hz,  $^5J(\text{F}^2, \text{F}^5) = 15$  Hz,  $^4J(\text{F}^2, \text{BF}) = 12$  Hz, 2F,  $\text{F}^2$ ,  $\text{F}^5$ ), –147.9 (dd,  $^3J(\text{F}^3, \text{F}^2) = 23$  Hz,  $^5J(\text{F}^3, \text{F}^6) = 15$  Hz, 2F,  $\text{F}^3$ ,  $\text{F}^6$ ).

Anal. calcd for  $\text{C}_{10}\text{H}_9\text{BF}_7\text{K}$  (312.08): C 38.49; H 2.91; B 3.46; F 42.61; found: C 39.0; H 2.15; B 3.46; F 42.8.

4.5. Anhydrous LiCl (68 mg, 1.6 mmol) was added to a stirred solution of  $\text{K}[\text{C}_6\text{F}_5\text{BF}_3]$  (418 mg, 1.50 mmol) in DME (6 mL) and formed suspension was stirred at 25 °C for 1 h. BuLi (2.4 M, 1.3 mL, 3.1 mmol) in hexanes was injected with syringe in portions and stirring was continued for an additional 2 h. After treatment with aqueous KF (10 mL) for 1 h, organic phase was decanted and dried with  $\text{MgSO}_4$ . The  $^{19}\text{F}$  NMR spectroscopy showed the presence of **6-K** (1.00 mmol), **7-K** (0.15 mmol) and 2,3,5,6-

C<sub>6</sub>F<sub>4</sub>HBU (0.10 mmol) besides **1-K** (0.04 mmol), and 2,3,4,5-C<sub>6</sub>F<sub>4</sub>HBU (0.04 mmol) (Table 2, entry 4).

4.6. Solution of [Bu<sub>4</sub>N][C<sub>6</sub>F<sub>5</sub>BF<sub>3</sub>] (0.90 mmol) in diglyme (6 mL) was cooled to 5 °C and BuLi in hexanes (2.5 M, 1 mL, 2.5 mmol) was added with syringe to keep temperature below 8 °C. Formed suspension was stirred at 22 °C for 2 h and acidified with HOAc (0.2 mL). Solution contained **1-N** (0.19 mmol), **6-N** (0.54 mmol), and **7-N** (0.19 mmol) (<sup>19</sup>F NMR) (Table 2, entry 5).

## 5. Reaction of K[C<sub>6</sub>F<sub>5</sub>BF<sub>3</sub>] with phenyllithium

5.1. A three-necked flask equipped with a reflux condenser topped with bubbler and gas inlet/outlet tube, a Teflon-coated magnetic bar, septum inlet, and adapter for an addition of PhLi was filled with dry argon and charged with K[C<sub>6</sub>F<sub>5</sub>BF<sub>3</sub>] and DME. The colorless solution was stirred for 10–15 min. PhLi in ether was siphoned into a measuring vessel and then added in portions to above solution. Immediately white precipitate formed. At the end saturated aqueous solution of KF (10 mL) was added to suspension, and after 1 h an organic phase was decanted and analyzed by <sup>19</sup>F NMR spectroscopy (Table 3).

**K[4-PhC<sub>6</sub>F<sub>4</sub>BF<sub>3</sub>] (10-K).** <sup>19</sup>F NMR (DME – ether): δ –134.0 (br. q (1:1:1:1), 3F, BF<sub>3</sub>), –135.2 (m, 2F, F<sup>2,6</sup>), –147.3 (dd, <sup>3</sup>J(F<sup>3</sup>, F<sup>2</sup>) = 24 Hz, <sup>5</sup>J(F<sup>3</sup>, F<sup>6</sup>) = 14 Hz, 2F, F<sup>3,5</sup>).

**K[2-PhC<sub>6</sub>F<sub>4</sub>BF<sub>3</sub>] (11-K).** <sup>19</sup>F NMR (DME – ether): δ –130.9 (br. q (1:1:1:1), 3F, BF<sub>3</sub>), –134.5 (m, 1F, F<sup>6</sup>), –142.8 (dd, <sup>3</sup>J(F<sup>3</sup>, F<sup>4</sup>) = 24 Hz, <sup>5</sup>J(F<sup>3</sup>, F<sup>6</sup>) = 14 Hz, 1F, F<sup>3</sup>), –161.4 (dd, <sup>3</sup>J(F<sup>4</sup>, F<sup>3</sup>) = 24 Hz, <sup>3</sup>J(F<sup>4</sup>, F<sup>5</sup>) = 20 Hz, 1F, F<sup>4</sup>), –162.7 (dd, <sup>3</sup>J(F<sup>5</sup>, F<sup>6</sup>) = 20 Hz, <sup>3</sup>J(F<sup>5</sup>, F<sup>4</sup>) = 20 Hz, 1F, F<sup>5</sup>).

**K[2,5-Ph<sub>2</sub>C<sub>6</sub>F<sub>3</sub>BF<sub>3</sub>] (12).** <sup>19</sup>F NMR (DME – ether): δ –131.0 (br, 4F, 1F<sup>6</sup> and BF<sub>3</sub>), –143.3 (dd, <sup>3</sup>J(F<sup>4</sup>, F<sup>3</sup>) = 23 Hz, <sup>4</sup>J(F<sup>4</sup>, F<sup>6</sup>) = 4 Hz, 1F, F<sup>4</sup>), –146.3 (dd, <sup>3</sup>J(F<sup>3</sup>, F<sup>4</sup>) = 23 Hz, <sup>5</sup>J(F<sup>3</sup>, F<sup>6</sup>) = 16 Hz, 1F, F<sup>3</sup>).

**K[2,4-Ph<sub>2</sub>C<sub>6</sub>F<sub>3</sub>BF<sub>3</sub>] (13).** <sup>19</sup>F NMR (DME – ether): δ –121.5 (d, <sup>5</sup>J(F<sup>3</sup>, F<sup>6</sup>) = 17 Hz, 1F, F<sup>3</sup>), –131.0 (br, 3F, BF<sub>3</sub>), –137.5 (ddq (1:1:1:1), <sup>3</sup>J(F<sup>6</sup>, F<sup>5</sup>) = 23 Hz, <sup>5</sup>J(F<sup>6</sup>, F<sup>3</sup>) = 17 Hz, <sup>4</sup>J(F<sup>6</sup>, BF) = 13 Hz, 1F, F<sup>6</sup>), –142.5 (d, <sup>3</sup>J(F<sup>5</sup>, F<sup>6</sup>) = 23 Hz, 1F, F<sup>6</sup>).

5.2. A four-necked flask equipped with a reflux condenser topped with bubbler and gas inlet/outlet tube, a Teflon-coated magnetic bar, thermometer, septum inlet, and adapter for addition of PhLi was filled with dry argon and charged with K[C<sub>6</sub>F<sub>5</sub>BF<sub>3</sub>] (132 mg, 0.48 mmol) in DME (5 mL). PhLi in ether (2.2 mL, 0.77 mmol) was added in portions. Immediately white suspension formed. The reaction mixture was stirred at 37–40 °C for 1 h, cooled to 22 °C and filtered. The filtrate contained **1-Li** (0.02 mmol), **10-Li** (0.16 mmol), **11-Li** (0.15 mmol), **9-Li** (0.02 mmol), 2,3,5,6-C<sub>6</sub>F<sub>4</sub>HPh (0.02 mmol) and 2,3,4,5-C<sub>6</sub>F<sub>4</sub>HPh (0.01 mmol) (Table 3, entry 6).

## 6. Hydrodeboration of potassium polyfluoroaryltrifluoroborates with MeOH

6.1. An ampoule was equipped with a magnetic bar, charged with K[BuC<sub>6</sub>F<sub>4</sub>BF<sub>3</sub>], K[Bu<sub>2</sub>C<sub>6</sub>F<sub>3</sub>BF<sub>3</sub>] (see 4.3.) and MeOH (5 mL) and flame-sealed. The suspension was stirred at 90–100 °C (bath) for 9 h. After cooling, volatiles were evaporated under reduced pressure and residue was extracted with ether (2 mL). The extract contained **16**, **17**, **18**, **19** and 1,5-dibutyl-2,3,4-trifluorobenzene in molar ratio 11:10:18:10:3 (<sup>19</sup>F NMR).

**1-Butyl-2,3,5,6-tetrafluorobenzene (16).** <sup>19</sup>F NMR (ether): δ –140.5 (ddd, <sup>3</sup>J(F<sup>3</sup>, H<sup>4</sup>) = 10 Hz, <sup>3</sup>J(F<sup>3</sup>, F<sup>2</sup>) = 22 Hz, <sup>5</sup>J(F<sup>3</sup>, F<sup>6</sup>) = 13 Hz, 2F, F<sup>3</sup>, <sup>5</sup>), –145.2 (ddd, <sup>4</sup>J(F<sup>2</sup>, H<sup>4</sup>) = 10 Hz, <sup>3</sup>J(F<sup>2</sup>, F<sup>3</sup>) = 22 Hz, <sup>5</sup>J(F<sup>2</sup>, F<sup>5</sup>) = 13 Hz, 2F, F<sup>2</sup>, <sup>6</sup>).

**1-Butyl-2,3,4,5-tetrafluorobenzene (17).** <sup>19</sup>F NMR (ether): δ –141.8 (m, 1F, F<sup>5</sup>), –144.4 (dd, <sup>3</sup>J(F<sup>2</sup>, F<sup>3</sup>) = 20 Hz, <sup>5</sup>J(F<sup>2</sup>, F<sup>5</sup>) = 14 Hz, 1F, F<sup>2</sup>), –157.9 (dddd, <sup>3</sup>J(F<sup>3</sup>, F<sup>2</sup>) = 19 Hz, <sup>3</sup>J(F<sup>3</sup>, F<sup>4</sup>) = 20 Hz, <sup>4</sup>J(F<sup>3</sup>, F<sup>5</sup>) = 5 Hz, <sup>5</sup>J(F<sup>3</sup>, H<sup>6</sup>) = 5 Hz, 1F, F<sup>3</sup>), –161.4 (dd, <sup>3</sup>J(F<sup>4</sup>, F<sup>3</sup>) = 20 Hz, <sup>4</sup>J(F<sup>4</sup>, F<sup>5</sup>) = 22 Hz, 1F, F<sup>4</sup>) (lit. δ –141.3, –145.3, –157.2 and –160.4 (dt, 1F) [7]).

**1,3-Dibutyl-2,4,5-trifluorobenzene (18).** <sup>19</sup>F NMR (ether): δ –126.2 (d, <sup>5</sup>J(F<sup>2</sup>, F<sup>5</sup>) = 17 Hz, 1F, F<sup>2</sup>), –139.2 (m, 1F, F<sup>5</sup>), –144.1 (d, <sup>3</sup>J(F<sup>4</sup>, F<sup>5</sup>) = 23 Hz, 1F, F<sup>4</sup>).

**1,4-Dibutyl-2,3,5-trifluorobenzene (19).** <sup>19</sup>F NMR (ether): δ –114.2 (dd, <sup>3</sup>J(F<sup>5</sup>, H<sup>6</sup>) = 9 Hz, <sup>5</sup>J(F<sup>5</sup>, F<sup>2</sup>) = 16 Hz, 1F, F<sup>5</sup>), –140.6 (dd, <sup>3</sup>J(F<sup>3</sup>, F<sup>2</sup>) = 21 Hz, <sup>5</sup>J(F<sup>3</sup>, H<sup>6</sup>) = 5 Hz, 1F, F<sup>3</sup>), –149.1 (dd, <sup>3</sup>J(F<sup>2</sup>, F<sup>3</sup>) = 21 Hz, <sup>5</sup>J(F<sup>2</sup>, F<sup>5</sup>) = 15 Hz, 1F, F<sup>2</sup>).

**1,5-Dibutyl-2,3,4-trifluorobenzene.**  $^{19}\text{F}$  NMR (ether):  $\delta$  -144.0 (d,  $^3J(\text{F}^2, \text{F}^3) = 22$  Hz, 2F,  $\text{F}^{2,4}$ ), -161.0 (t,  $^3J(\text{F}^3, \text{F}^{2,4}) = 22$  Hz, 1F,  $\text{F}^3$ ) (tentative assignment).

GC-MS.  $\text{M}^+$  (%): 206 (2%), 206 (17%), 206 (12%) ( $\text{C}_{10}\text{H}_{10}\text{F}_4$ ), 244 (2%), 244 (6%), 244 (19%), 244 (16%) ( $\text{C}_{14}\text{H}_{19}\text{F}_3$ ).

HRMS (ESI) (mixture of  $\text{C}_6\text{HF}_4\text{C}_4\text{H}_9$  and  $\text{C}_6\text{HF}_3(\text{C}_4\text{H}_9)_2$ ),  $m/z$ . calcd. for  $\text{C}_{10}\text{H}_{10}\text{F}_4$  206.0713; found 206.0706; calcd. for  $\text{C}_{14}\text{H}_{19}\text{F}_3$  244.1433; found 244.1428.

6.2. Solution of **1-K**, **10-K** and **11-K** (Table 3, entry 2) was diluted with  $\text{MeOCH}_2\text{CH}_2\text{OH}$  (2.5 mL) and refluxed (124 °C, bath) with stirring for 7 h. The solution contained **1-K**, **10-K** (5:1), **14**, **15**,  $\text{C}_6\text{F}_5\text{H}$ ,  $\text{K}[\text{BF}_4]$  and  $\text{K}[\text{BF}_3\text{OCH}_2\text{CH}_2\text{OMe}]$  ( $^{19}\text{F}$  NMR). The solution was stirred under reflux for an additional 4 h, evaporated under reduced pressure and residue was extracted with  $\text{CH}_2\text{Cl}_2$  (4 mL). Solution of **14** and **15** was obtained ( $^{19}\text{F}$  NMR).

**2,3,5,6-Tetrafluorobiphenyl (14).**  $^{19}\text{F}$  NMR ( $\text{CH}_2\text{Cl}_2$ ):  $\delta$  -140.2 (ddd,  $^3J(\text{F}^3, \text{H}^4) = 10$  Hz,  $^3J(\text{F}^3, \text{F}^2) = 23$  Hz,  $^5J(\text{F}^3, \text{F}^6) = 12$  Hz, 2F,  $\text{F}^{3,5}$ ), -144.7 (m,  $\text{F}^{2,6}$ ) (lit.  $\delta$  -139.9 and -144.3 [8], -139.1 and -143.9 [9]).

**2,3,4,5-Tetrafluorobiphenyl (15).**  $^{19}\text{F}$  NMR ( $\text{CH}_2\text{Cl}_2$ ):  $\delta$  -140.7 (ddd,  $^3J(\text{F}^5, \text{F}^4) = 22$  Hz,  $^3J(\text{F}^5, \text{H}^6) = 10$  Hz,  $^5J(\text{F}^5, \text{F}^2) = 11$  Hz, 1F,  $\text{F}^5$ ), -144.9 (ddd,  $^3J(\text{F}^2, \text{F}^3) = 22$  Hz,  $^4J(\text{F}^2, \text{H}^6) = 8$  Hz,  $^5J(\text{F}^2, \text{F}^5) = 13$  Hz, 1F,  $\text{F}^2$ ), -156.6 (dd,  $^3J(\text{F}^3, \text{F}^4) = 20$  Hz,  $^3J(\text{F}^3, \text{F}^2) = 22$  Hz, 1F,  $\text{F}^3$ ), -158.5 (ddd,  $^3J(\text{F}^4, \text{F}^3) = 20$  Hz,  $^3J(\text{F}^4, \text{F}^5) = 22$  Hz,  $^4J(\text{F}^4, \text{H}^6) = 8$  Hz, 1F,  $\text{F}^4$ ) (lit.  $\delta$  -140.4, -144.3, -156.0, and 158.0 [8], -139.6 (m, 1F), -143.7 (m, 1F), -155.2 (m, 1F), -157.1 (m, 1F) [9]).

6.3. Solution of borates (Table 3, entries 1 and 3) was evaporated to dryness under reduced pressure and formed solid was stirred with  $\text{MeOH}$  (6 mL) at 90–95 °C for 6 h in a sealed tube. After evaporation of the solvent, residue was extracted with acetone (2 mL). The extract contained **14**, **15**, **20** and **21** in molar ratio 160:100:15:18 ( $^{19}\text{F}$  NMR).

**2,3,5,6-Tetrafluorobiphenyl (14).**  $^{19}\text{F}$  NMR (acetone):  $\delta$  -139.3 (ddd,  $^3J(\text{F}^3, \text{H}^4) = 10$  Hz,  $^3J(\text{F}^3, \text{F}^2) = 22$  Hz,  $^5J(\text{F}^3, \text{F}^6) = 13$  Hz, 2F,  $\text{F}^{3,5}$ ), -143.8 (ddd,  $^3J(\text{F}^2, \text{F}^3) = 22$  Hz,  $^4J(\text{F}^2, \text{H}^4) = 8$  Hz,  $^5J(\text{F}^2, \text{F}^5) = 13$  Hz, 2F,  $\text{F}^{2,6}$ ).



**2,3,4,5-Tetrafluorobiphenyl (15).**  $^{19}\text{F}$  NMR (acetone):  $\delta$  -139.8 (ddd,  $^3J(\text{F}^5, \text{F}^4) = 21$  Hz,  $^3J(\text{F}^5, \text{H}^6) = 11$  Hz,  $^5J(\text{F}^5, \text{F}^2) = 12$  Hz, 1F,  $\text{F}^5$ ), -142.1 (ddd,  $^3J(\text{F}^2, \text{F}^3) = 22$  Hz,  $^4J(\text{F}^2, \text{H}^6) = 10$  Hz,  $^5J(\text{F}^2, \text{F}^5) = 15$  Hz, 1F,  $\text{F}^2$ ), -156.2 (dddd,  $^3J(\text{F}^3, \text{F}^4) = 20$  Hz,  $^3J(\text{F}^3, \text{F}^2) = 22$  Hz,  $^4J(\text{F}^3, \text{F}^5) = 2$  Hz,  $^5J(\text{F}^3, \text{H}^6) = 2$  Hz, 1F,  $\text{F}^3$ ), -158.2 (dddd,  $^3J(\text{F}^4, \text{F}^3) = 20$  Hz,  $^3J(\text{F}^3, \text{F}^5) = 21$  Hz,  $^4J(\text{F}^4, \text{F}^2) = 2$  Hz,  $^4J(\text{F}^4, \text{H}^6) = 8$  Hz, 1F,  $\text{F}^4$ ).

**1,3-Diphenyl-2,4,5-trifluorobenzene (20).**  $^{19}\text{F}$  NMR (MeOH):  $\delta$  -122.7 (d,  $^5J(\text{F}^2, \text{F}^5) = 15$  Hz, 1F,  $\text{F}^2$ ), -139.4 (ddd,  $^3J(\text{F}^4, \text{F}^5) = 22$  Hz,  $^4J(\text{F}^4, \text{H}^6) = 9$  Hz,  $^4J(\text{F}^4, \text{F}^2) = 4$  Hz, 1F,  $\text{F}^4$ ), -142.1 (ddd,  $^3J(\text{F}^5, \text{F}^4) = 22$  Hz,  $^3J(\text{F}^5, \text{H}^6) = 11$  Hz,  $^5J(\text{F}^5, \text{F}^2) = 15$  Hz, 1F,  $\text{F}^5$ ).  $^{19}\text{F}$  NMR (acetone):  $\delta$  -121.9 (d,  $^5J(\text{F}^2, \text{F}^5) = 16$  Hz, 1F,  $\text{F}^2$ ), -138.8 (d,  $^3J(\text{F}^4, \text{F}^5) = 22$  Hz, 1F,  $\text{F}^4$ ), -139.2 (dd,  $^3J(\text{F}^5, \text{F}^4) = 22$  Hz,  $^3J(\text{F}^5, \text{H}^6) = 8$  Hz, 1F,  $\text{F}^5$ ;  $^5J(\text{F}^5, \text{F}^2)$  value was not determined because overlapping with signal  $\text{F}^4$ ).

**1,4-Diphenyl-2,3,5-trifluorobenzene (21).**  $^{19}\text{F}$  NMR (MeOH):  $\delta$  -119.5 (dd,  $^3J(\text{F}^5, \text{H}^6) = 10$  Hz,  $^5J(\text{F}^5, \text{F}^2) = 14$  Hz, 1F,  $\text{F}^5$ ), -137.9 (d,  $^3J(\text{F}^3, \text{F}^5) = 21$  Hz, 1F,  $\text{F}^3$ ), -147.4 (ddd,  $^3J(\text{F}^2, \text{F}^3) = 21$  Hz,  $^4J(\text{F}^2, \text{H}^6) = 5$  Hz,  $^5J(\text{F}^2, \text{F}^5) = 14$  Hz, 1F,  $\text{F}^2$ ).  $^{19}\text{F}$  NMR (acetone):  $\delta$  -119.5 (ddd,  $^3J(\text{F}^5, \text{H}^6) = 11$  Hz,  $^4J(\text{F}^5, \text{F}^3) = 4$  Hz,  $^5J(\text{F}^5, \text{F}^2) = 15$  Hz, 1F,  $\text{F}^5$ ), -137.8 (d,  $^3J(\text{F}^3, \text{F}^2) = 20$  Hz, 1F,  $\text{F}^3$ ), -147.2 (ddd,  $^3J(\text{F}^2, \text{F}^3) = 20$  Hz,  $^4J(\text{F}^2, \text{H}^6) = 6$  Hz,  $^5J(\text{F}^2, \text{F}^5) = 15$  Hz, 1F,  $\text{F}^2$ ).

GC-MS ( $\text{M}^+$ /retention time, min): 226/12.18 and 226/12.39 ( $\text{C}_{12}\text{H}_6\text{F}_4$ ), 284/20.66, 284/20.93 ( $\text{C}_{18}\text{H}_{11}\text{F}_3$ ).

HRMS (ESI) (mixture of  $\text{C}_{12}\text{H}_6\text{F}_4$  and  $\text{C}_{18}\text{H}_{11}\text{F}_3$ ),  $m/z$ : calcd. for  $\text{C}_{12}\text{H}_6\text{F}_4$  226.0405 and for  $\text{C}_{18}\text{H}_{11}\text{F}_3$  284.0813; found 226.0400 and 284.0809.

## 7. Attempted reaction of $\text{K}[\text{C}_6\text{F}_5\text{BF}_3]$ with phenylethynyllithium

7.1. A three-necked flask equipped with a reflux condenser topped with bubbler and gas inlet/outlet tube, a Teflon-coated magnetic bar, septum inlet, and adapter for addition of  $\text{PhC}\equiv\text{CLi}$  was flushed with dry argon and charged with  $\text{K}[\text{C}_6\text{F}_5\text{BF}_3]$  (112 mg, 0.40 mmol) and DME (3 mL). Colorless solution was stirred for 10–15 min.  $\text{PhC}\equiv\text{CLi}$  in ether (0.40 M, 2 mL, 0.80 mmol) was siphoned into a measuring vessel and added in a one portion to above solution. The solution was stirred at 22 °C for 17 h and saturated aqueous solution of KF (6 mL) was added into flask. After 1 h an organic phase was decanted and dried with  $\text{MgSO}_4$ . The  $^{19}\text{F}$  NMR spectrum showed signals of  $\text{K}[\text{C}_6\text{F}_5\text{BF}_3]$  (0.37 mmol) only.

7.2. Solution of  $\text{K}[\text{C}_6\text{F}_5\text{BF}_3]$  (121 mg, 0.44 mmol) in DME (3 mL) was reacted with  $\text{PhC}\equiv\text{CLi}$  in ether (0.40 M, 2 mL, 0.80 mmol) at 40 °C (bath) over a period of 2 h and treated as above. Starting  $\text{K}[\text{C}_6\text{F}_5\text{BF}_3]$  (0.36 mmol) was detected with  $^{19}\text{F}$  NMR spectroscopy beside trace of unknown products.

7.3. Solution of  $\text{K}[\text{C}_6\text{F}_5\text{BF}_3]$  (123 mg, 0.44 mmol) in DME (4 mL) and  $\text{PhC}\equiv\text{CLi}$  in ether (0.45 M, 2 mL, 0.90 mmol) were combined, refluxed (58 °C, bath) for 5 h and cooled. A probe showed signals of **1-K** only ( $^{19}\text{F}$  NMR). The solution was treated with saturated aqueous solution of KF (10 mL) (see 7.1). The  $^{19}\text{F}$  NMR spectrum showed signals of  $\text{K}[\text{C}_6\text{F}_5\text{BF}_3]$  (0.44 mmol).

## 8. Reaction of $\text{M}[\text{C}_6\text{F}_5\text{BF}_3]$ with alkali halides

8.1.  $\text{K}[\text{C}_6\text{F}_5\text{BF}_3]$  (565 mg, 2.06 mmol) was added to solution of anhydrous LiBr (172 mg, 2.0 mmol) in MeCN (18 mL). Immediately white suspension formed. It was stirred for 1 h, centrifuged, and the mother liquor was evaporated to dryness on evaporator to give pale-yellow solid (668 mg; the expected yield for  $\text{Li}[\text{C}_6\text{F}_5\text{BF}_3]\cdot 2\text{CH}_3\text{CN}$  is 648 mg). Dissolution of a probe (0.12 mmol) in DME showed replacement of  $\text{CH}_3\text{CN}$  (0.22 mmol) with DME (see  $^{11}\text{B}$  and  $^{19}\text{F}$  NMR spectra, Table 4).

$\text{Li}[\text{C}_6\text{F}_5\text{BF}_3]$ .  $^1\text{H}$  NMR (DME):  $\delta$  3.42 and 3.26 (DME), 1.93 (non-coordinated  $\text{CH}_3\text{CN}$ ) (0.22 mmol).

8.2.  $\text{K}[\text{C}_6\text{F}_5\text{BF}_3]$  (116 mg, 0.42 mmol) was added to stirred suspension of anhydrous Lil (173 mg, 1.29 mmol) in DME (1 mL) and ether (2 mL) and maintained over a period of 4 h.  $\text{Li}[\text{C}_6\text{F}_5\text{BF}_3]$  was obtained in quantitative yield ( $^{19}\text{F}$  NMR).

$\text{Li}[\text{C}_6\text{F}_5\text{BF}_3]$ .  $^{19}\text{F}$  NMR (DME–ether):  $\delta$  –134.3 (m, 2F,  $\text{F}^{2,6}$ ), –138.62 (q (1:1:1:1),  $^1J(\text{F}, \text{B}) = 44$  Hz, 3F,  $\text{BF}_3$ ), –161.1 (t,  $^3J(\text{F}^4, \text{F}^{3,5}) = 20$  Hz, 1F,  $\text{F}^4$ ), –166.0 (m, 2F,  $\text{F}^{3,5}$ ).

8.3.  $\text{K}[\text{C}_6\text{F}_5\text{BF}_3]$  (97 mg, 0.35 mmol) was added to suspension of anhydrous Lil (124 mg, 0.92 mmol) in DME (1 mL) and stirred at 70–73 °C (bath) for 5 h. Suspension was cooled and stirred with saturated aqueous KF for 2 h and organic phase was decanted. It contained  $\text{K}[\text{C}_6\text{F}_5\text{BF}_3]$  (0.06 mmol) and  $\text{C}_6\text{F}_5\text{H}$  (0.25 mmol).

8.4.  $\text{K}[\text{C}_6\text{F}_5\text{BF}_3]$  (155 mg, 0.56 mmol) was added to suspension of anhydrous  $\text{LiBr}$  (148 mg, 1.7 mmol) in DME (2 mL) and stirred at 55–60 °C (bath) for 4 h. After cooling, the supernate contained  $\text{Li}[\text{C}_6\text{F}_5\text{BF}_3]$  (0.44 mmol),  $\text{C}_6\text{F}_5\text{B}(\text{OH})_2$  (0.06 mmol) and  $\text{C}_6\text{F}_5\text{H}$  (0.03 mmol).

8.5.  $\text{K}[\text{C}_6\text{F}_5\text{BF}_3]$  (156 mg, 0.56 mmol) was added to suspension of anhydrous  $\text{LiCl}$  (90 mg, 2.0 mmol) in DME (2 mL) and stirred at 55–60 °C (bath) for 4 h. After cooling, the supernate contained  $\text{Li}[\text{C}_6\text{F}_5\text{BF}_3]$  (0.39 mmol),  $\text{C}_6\text{F}_5\text{B}(\text{OH})_2$  (0.07 mmol) and  $\text{C}_6\text{F}_5\text{H}$  (0.03 mmol).

8.6. Suspension of  $\text{Li}[\text{C}_6\text{F}_5\text{BF}_3]$  (0.25 mmol) and anhydrous  $\text{LiI}$  (53 mg, 0.40 mmol) in DME (0.5 mL) was kept at 65–70 °C (bath) for 4 h to form a brownish solution. It was washed with saturated aqueous  $\text{KF}$  and organic phase was decanted. It contained  $\text{K}[\text{C}_6\text{F}_5\text{BF}_3]$  (0.02 mmol, 91% conversion) and  $\text{C}_6\text{F}_5\text{H}$  (0.22 mmol).

8.7.  $[\text{Bu}_4\text{N}][\text{C}_6\text{F}_5\text{BF}_3]$  (0.4 mmol) and anhydrous  $\text{LiI}$  (94 mg, 0.70 mmol) in diglyme (0.5 mL) was stirred at 65–70 °C (bath) for 4 h. After centrifugation the organic phase was decanted, precipitate was washed with diglyme. The combined solution was washed with saturated aqueous  $\text{KF}$  and analyzed by the  $^{19}\text{F}$  NMR spectroscopy to show presence of  $[\text{C}_6\text{F}_5\text{BF}_3]^-$  (0.17 mmol, 57% conversion) and  $\text{C}_6\text{F}_5\text{H}$  (0.23 mmol).

## 9. Stability of $\text{M}[\text{C}_6\text{F}_5\text{BF}_3]$ in solution

9.1. Solution of  $\text{Li}[\text{C}_6\text{F}_5\text{BF}_3]$  in DME was kept at 22 °C for 1 week. No reaction occurred ( $^{19}\text{F}$  NMR). Heating in a sealed tube at 60–68 °C for 5 h gave the same result.

9.2. Solution of  $[\text{Bu}_4\text{N}][\text{C}_6\text{F}_5\text{BF}_3]$  in diglyme was kept in a sealed tube at 60–68 °C for 4 h. No changes occurred.

## 10. Reaction of $\text{K}[\text{C}_6\text{F}_5\text{BF}_3]$ with $\text{MeONa}$ (excess)

A 20 mL flask equipped with a magnetic stir bar was charged with DMF (5 mL) and  $\text{MeOH}$  (111 mg, 3.4 mmol).  $\text{NaH}$  (119 mg, 2.8 mmol) was added in one portion to cause gas evolution and foaming. Suspension was stirred at 25 °C for 1 h under an atmosphere of argon and  $\text{K}[\text{C}_6\text{F}_5\text{BF}_3]$  (259 mg, 0.94 mmol) was added in one portion.

The flask was immersed into a pre-heated oil bath (130 °C), and the reaction mixture was stirred for 5 h. The  $^{19}\text{F}$  NMR spectrum showed the formation of  $\text{M}[4\text{-MeOC}_6\text{F}_4\text{BF}_3]$ ,  $\text{M}[3,4\text{-(MeO)}_2\text{C}_6\text{F}_3\text{BF}_3]$ ,  $\text{M}[2,4\text{-(MeO)}_2\text{C}_6\text{F}_3\text{BF}_3]$  and  $2,3,5,6\text{-C}_6\text{F}_4\text{HOH}$  ( $\text{M} = \text{K}, \text{Na}$ ) in ratio 100 : 15 : 19 : 24. Water (0.5 mL) and  $\text{K}[\text{HF}_2]$  (0.9 g) were added, and mixture was stirred at 25 °C for 1 h. Organic phase was decanted and evaporated under reduced pressure. Residue was washed with  $\text{CH}_2\text{Cl}_2$  (2 × 8 mL), dried on evaporator and extracted with DME (2 mL). Solution contained  $\text{K}[4\text{-MeOC}_6\text{F}_4\text{BF}_3]$  [10] (0.60 mmol),  $\text{K}[3,4\text{-(MeO)}_2\text{C}_6\text{F}_3\text{BF}_3]$  (**22**) (0.10 mmol),  $\text{K}[2,4\text{-(MeO)}_2\text{C}_6\text{F}_3\text{BF}_3]$  (**23**) (0.13 mmol) and  $2,3,5,6\text{-C}_6\text{F}_4\text{HOH}$  [10] (0.03 mmol) ( $^{19}\text{F}$  NMR, with  $\text{CF}_3\text{COOH}$  quantitative internal reference).

**$\text{K}[3,4\text{-(MeO)}_2\text{C}_6\text{F}_3\text{BF}_3]$  (**22**).**  $^{19}\text{F}$  NMR (DME):  $\delta$  -130.4 (dq (1:1:1:1),  $^5J(\text{F}^2, \text{F}^5) = 12$  Hz,  $^4J(\text{F}^2, \text{BF}) = 12$  Hz, 1F,  $\text{F}^2$ ), -137.8 (m, 3F,  $\text{BF}_3$ ), -138.6 (dq (1:1:1:1),  $^3J(\text{F}^6, \text{F}^5) = 24$  Hz,  $^4J(\text{F}^6, \text{BF}) = 12$  Hz, 1F,  $\text{F}^6$ ), -163.2 (dd,  $^3J(\text{F}^5, \text{F}^6) = 24$  Hz,  $^5J(\text{F}^5, \text{F}^2) = 12$  Hz, 1F,  $\text{F}^5$ ).  $^{19}\text{F}$  NMR (DMF):  $\delta$  -127.2 (dq (1:1:1:1),  $^5J(\text{F}^2, \text{F}^5) = 12$  Hz,  $^4J(\text{F}^2, \text{BF}) = 12$  Hz, 1F,  $\text{F}^2$ ), -132.8 (m, 3F,  $\text{BF}_3$ ), -135.8 (dq (1:1:1:1),  $^3J(\text{F}^6, \text{F}^5) = 24$  Hz,  $^4J(\text{F}^6, \text{BF}) = 12$  Hz, 1F,  $\text{F}^6$ ), -161.5 (dd,  $^3J(\text{F}^5, \text{F}^6) = 24$  Hz,  $^5J(\text{F}^5, \text{F}^2) = 12$  Hz, 1F,  $\text{F}^5$ ).

**$\text{K}[2,4\text{-(MeO)}_2\text{C}_6\text{F}_3\text{BF}_3]$  (**23**).**  $^{19}\text{F}$  NMR (DME):  $\delta$  -137.8 (m, 3F,  $\text{BF}_3$ ), -138.4 (ddq (1:1:1:1),  $^3J(\text{F}^6, \text{F}^5) = 24$  Hz,  $^5J(\text{F}^6, \text{F}^3) = 12$  Hz,  $^4J(\text{F}^6, \text{BF}) = 12$  Hz, 1F,  $\text{F}^6$ ), -154.7 (d,  $^5J(\text{F}^3, \text{F}^6) = 12$  Hz, 1F,  $\text{F}^3$ ), -161.3 (d,  $^3J(\text{F}^5, \text{F}^6) = 24$  Hz, 1F,  $\text{F}^5$ ).  $^{19}\text{F}$  NMR (DMF):  $\delta$  -132.8 (m, 3F,  $\text{BF}_3$ ), -135.5 (ddq (1:1:1:1),  $^3J(\text{F}^6, \text{F}^5) = 24$  Hz,  $^5J(\text{F}^6, \text{F}^3) = 12$  Hz,  $^4J(\text{F}^6, \text{BF}) = 12$  Hz, 1F,  $\text{F}^6$ ), -153.3 (d,  $^5J(\text{F}^3, \text{F}^6) = 12$  Hz, 1F,  $\text{F}^3$ ), -160.4 (m, 1F,  $\text{F}^5$ ).

## References

- Adonin, N. Y.; Babushkin, D. E.; Parmon, V. N.; Bardin, V. V.; Kostin, G. A.; Mashukov, V. I.; Frohn, H.-J. *Tetrahedron* **2008**, *64*, 5920-5924.
- Tegnér, C. *Acta Chem. Scand.* **1952**, *6*, 782-790.
- Jones, R. G.; Gilman, H. The Halogen-Metal Interconversion Reaction with Organolithium Compounds. In *Organic Reactions*; Adams, R., Ed.; Vol. 6; John Wiley & Sons, Inc.: New York, 1951; pp 339-356.
- Eaborn, C.; Walton, D. R. M. *J. Organomet. Chem.* **1964**, *2*, 95-97.
- Watson, S. C.; Eastham, J. F. *J. Organomet. Chem.* **1967**, *9*, 165-168.
- Adonin, N. Y.; Shabalin, A. Y.; Bardin, V. V. *J. Fluorine Chem.* **2014**, *168*, 111-120.

7. Bogachev, A. A.; Kobrina, L. S. *Zhurnal Org. Khimii* **1997**, 33, 742-744. ; *Russ. J. Org. Chem.* **1997**, 33, 681-683.
8. Bolton, R.; Sandall, J. P. B.; Williams, G. H. *J. Fluorine Chem.* **1974**, 4, 355-361.
9. Wei, Y.; Kan, J.; Wang, M.; Su, W. P.; Hong, M. C. *Org. Lett.* **2009**, 11, 3346-3349.
10. Shabalin, A. Y.; Adonin, N. Y.; Bardin, V. V.; Prikhod'ko, S. A.; Timofeeva, M. N.; Bykova, M. V.; Parmon, V. N. *J. Fluorine Chem.* **2013**, 149, 82-87.
